# Supplementary material
Source: publisher figshare collection journal article supplement (https://tandf.figshare.com/ndownloader/files/22055463)
Supplement: Supplementary file 1 [file 22055463]

**Effect of morphology and support of copper nanoparticles on basic ovarian granulosa cell functions**

Alexander V. Sirotkin,1* Monika Radosová,1 Adam Tarko,1 Iris Martín-García2 and

Francisco Alonso2*

1 Constantine The Philosopher University, Tr. A Hlinku 1, 949 74 Nitra, Slovakia

E-mail: [asirotkin@ukf.sk](mailto:asirotkin@ukf.sk)

*2 Instituto de Síntesis Orgánica (ISO) and Departamento de Química Orgánica,*

*Facultad de Ciencias, Universidad de Alicante, Apdo. 99, 03080 Alicante, Spain*

*E-mail: falonso@ua.es*

**Supporting Information**

**General** S2

**Supported CuNPs** S3

Figure S1. Characterization of CuNPs/C S3

Figure S2. Characterization of CuNPs/ZY S4

Figure S3. Characterization of CuNPs/TiO2 S5

**Unsupported CuNPs** S6

Figure S4. Characterization of spherical CuNPs S6

Figure S5. Characterization of triangular CuNPs S7

Figure S6. Characterization of hexagonal CuNPs S8

**Fluorescent images of porcine granulosa cells** S9

**References** S10

**General**

Copper(II) chloride (97%, Aldrich), lithium powder (MEDALCHEMY S.L.), 4,4′-di-*tert*-butylbiphenyl (DTBB, Sigma-Aldrich), sodium Y zeolite (Sigma-Aldrich), activated charcoal (Norit CA1, Sigma-Aldrich) and TiO2 (anatasa nanopowder, Alfa Aesar) were commercially available. Tetrahydrofuran (THF) was dried in a Sharlab PS-400-3MD solvent purification system using an alumina column. The transmission electron microscopy (TEM) images were recorded using a JEOLJEM2010 microscope, equipped with a lanthanum hexaboride filament operated at an acceleration voltage of 200 kV. For their observations, the as-prepared samples were mounted on holey-carbon coated gold grids. The size distribution of the nanoparticles was determined by TEM. The energy-dispersive X-ray spectroscopy (X-EDS) analyses were carried out with an Oxford Inca Energy TEM100 attachment. The X-ray photoelectron spectroscopy (XPS) spectra were measured with a VG-Microtech Multilab 3000 electron spectrometer using a non-monochromatized Mg-Kα (1253.6 eV, for CuNPs/C) and Al-Kα (1486.6 eV, for CuNPs supported on ZY and TiO2) radiation source of 300 W and a hemispheric electron analyser equipped with 9 channeltron electron multipliers. The pressure inside the analysis chamber during the scans was about 5·10–7 N·m–2. After the survey spectra were obtained, higher resolution survey scans were performed at pass energy of 50 eV. The intensities of the different contributions were obtained by means of the calculation of the integral of each peak, after having eliminated the baseline with S form and adjusting the experimental curves to a combination of Lorentz (30%) and Gaussian (70%) lines. All the bond energies were referred to the line of the C 1s to 284.4 eV, obtaining values with a precision of ± 0.2 eV. Inductively coupled plasma optical emission spectroscopy (ICP-OES) analyses were performed with a Perkin Elmer Optima 4300DV (dual vision) apparatus, using Cetac model U5000AT+ as an ultrasonic nebulizer.

**Supported CuNPs**

**Characterization of CuNPs/C**[1]





Cu2O

CuO

CuO

satellites


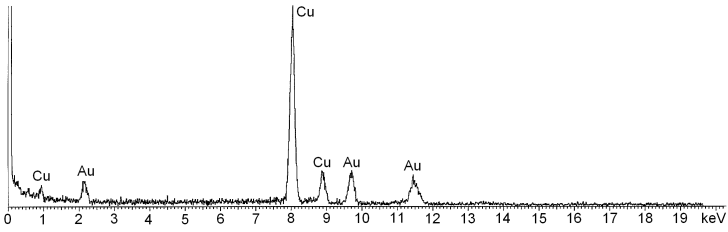


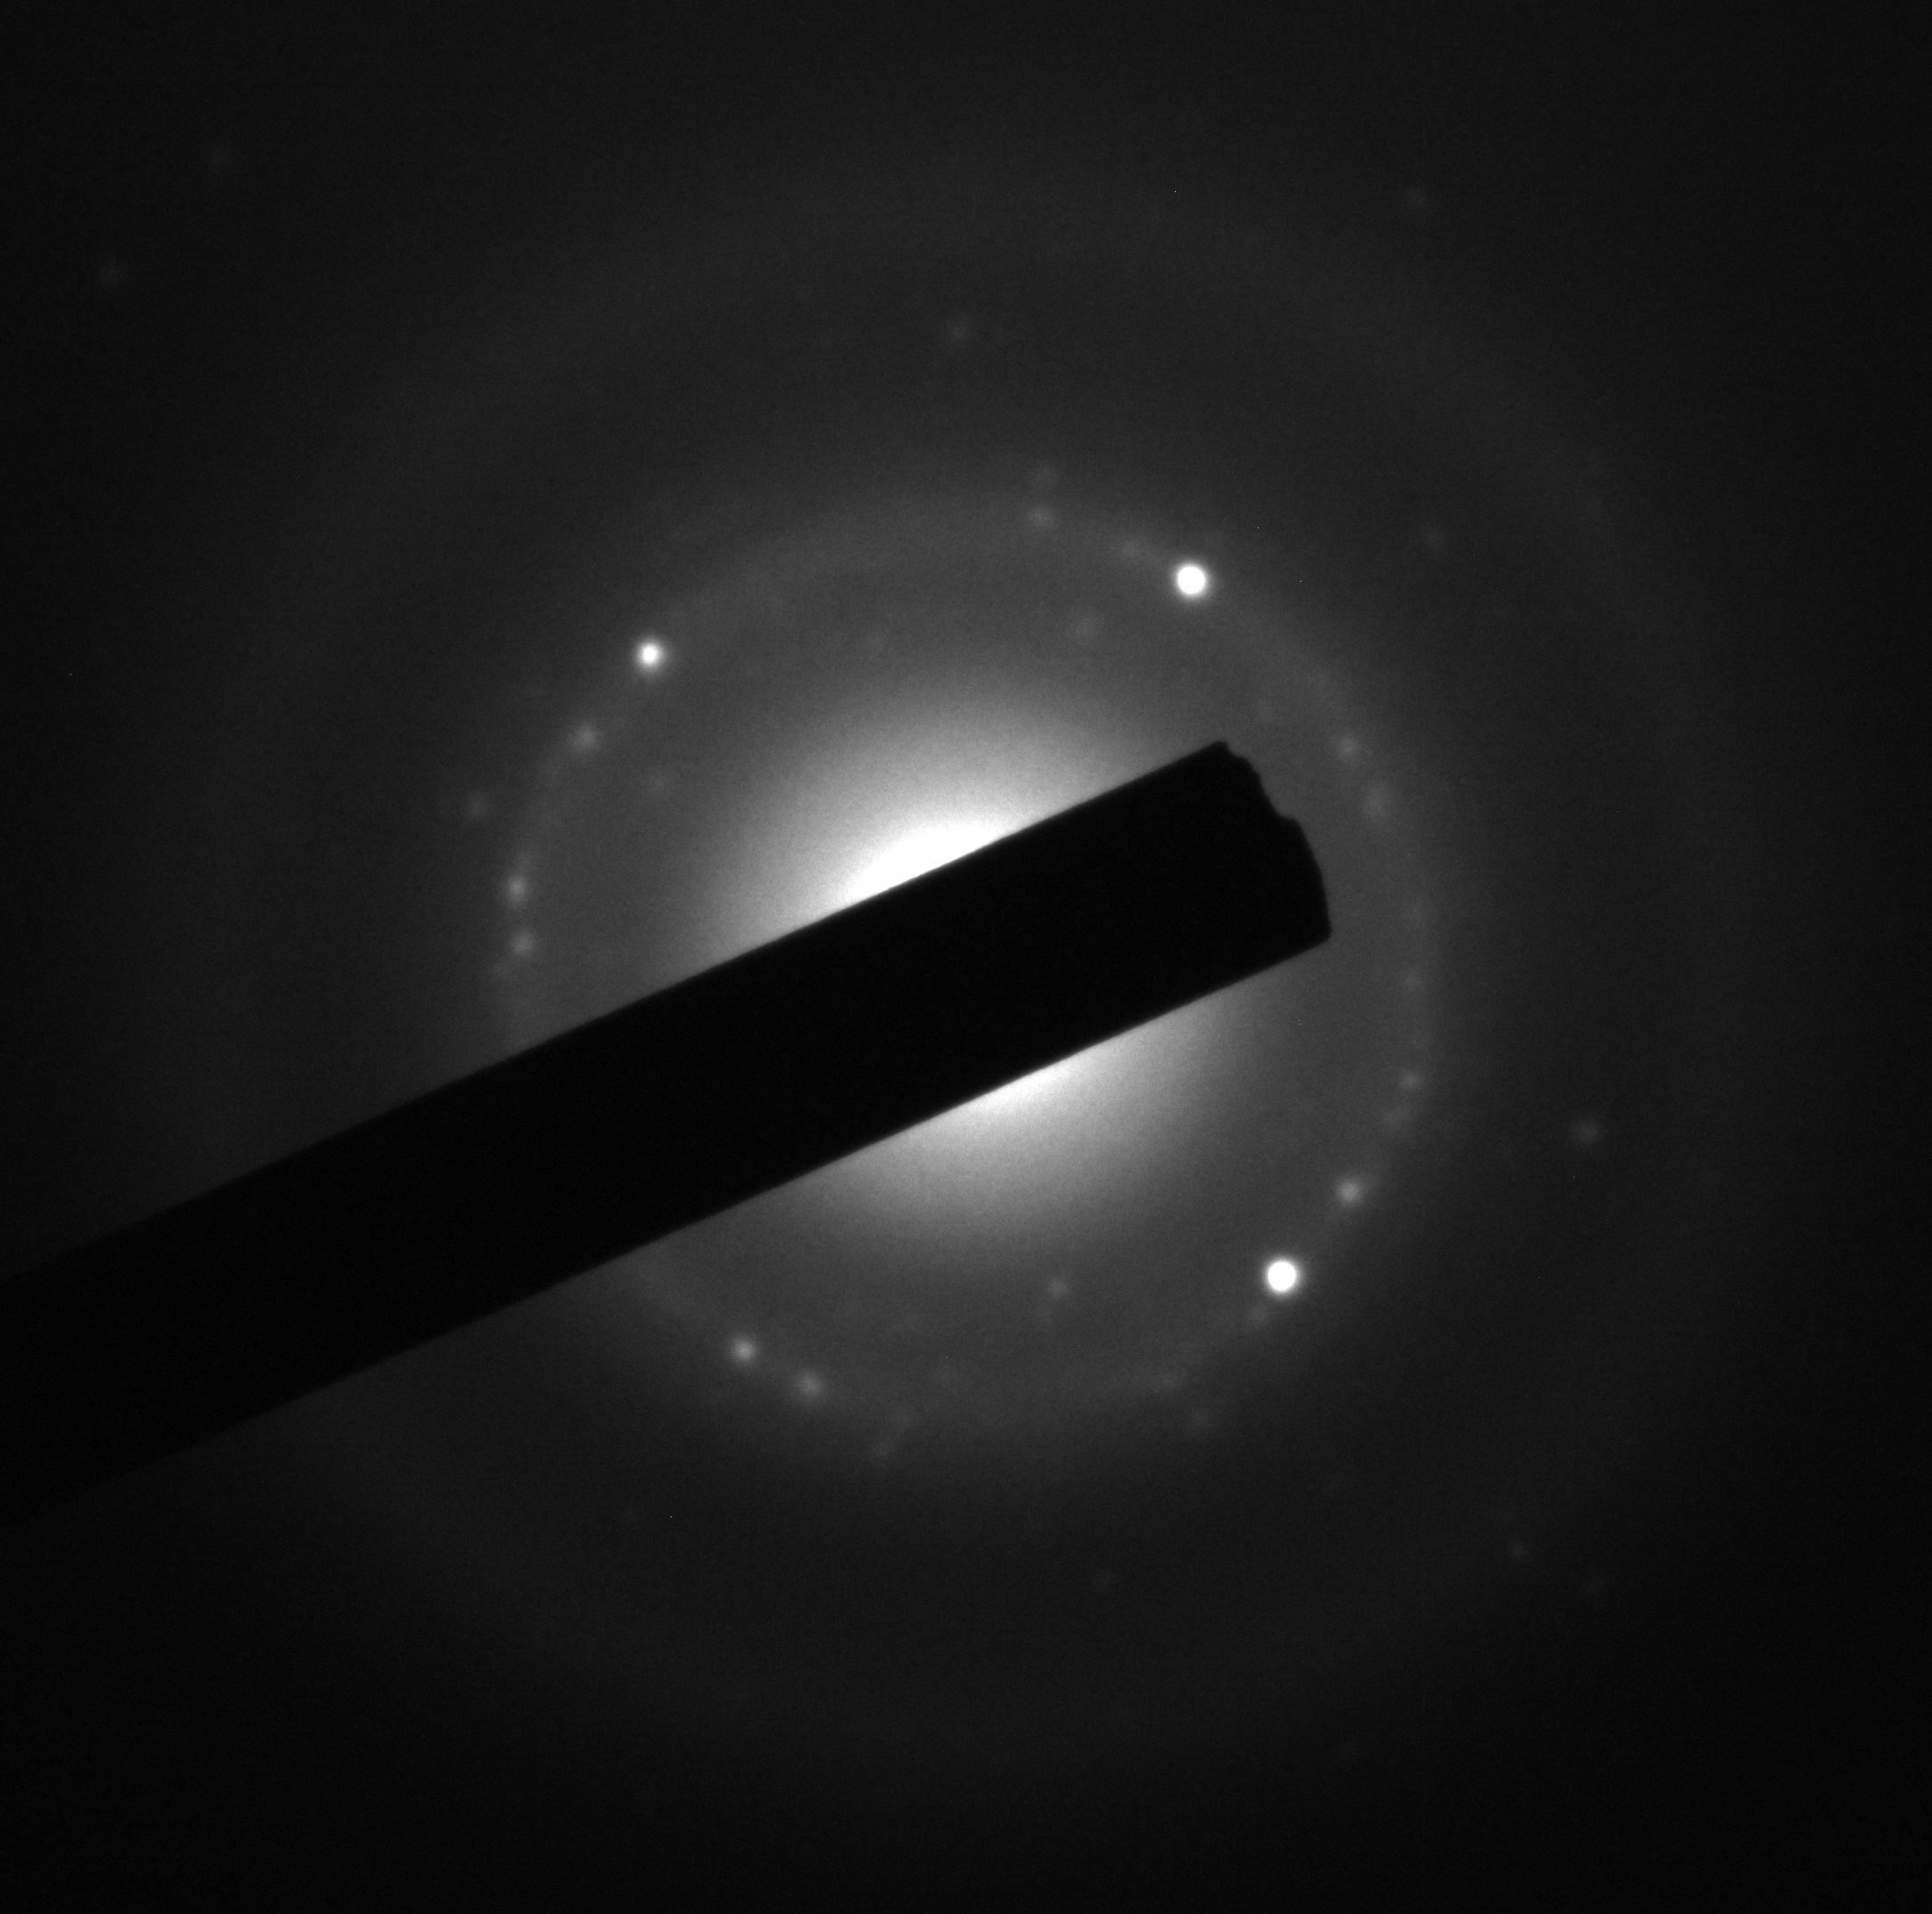


Cu2O (200)

CuO (222)

CuO (112)

Cu2O (220)

CuO (110)

CuO (002)

**Figure S1.** TEM micrograph, XPS spectrum at the Cu 2*p*3/2 level, EDX spectrum, selected area electron diffraction (SAED) pattern and size distribution (75 NPs) of CuNPs/C.

Median ± standard deviation: 5.95 ± 0.95 nm.

**Characterization of CuNPs/ZY**[2]







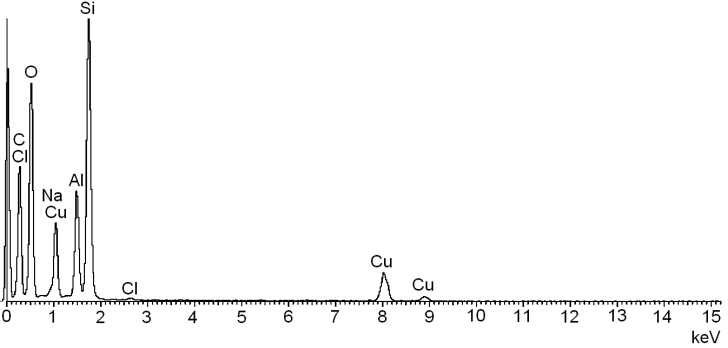


Cu2O

CuO

satellites

CuO

**Figure S2.** TEM micrographs, size distribution (200 NPs), EDX spectrum and XPS spectrum at the Cu 2*p*3/2 level of CuNPs/ZY.

Median ± standard deviation: 1.71 ± 0.35 nm.

**Characterization of CuNPs/TiO2 (anatase nanopowder, 15 nm)**[3]


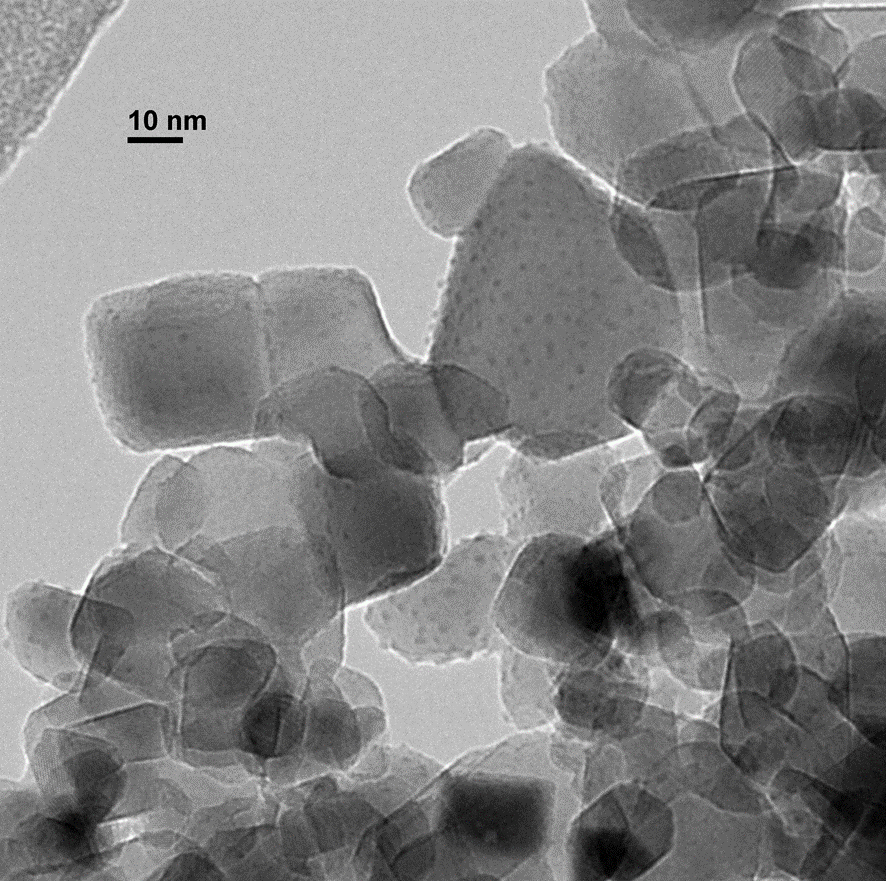

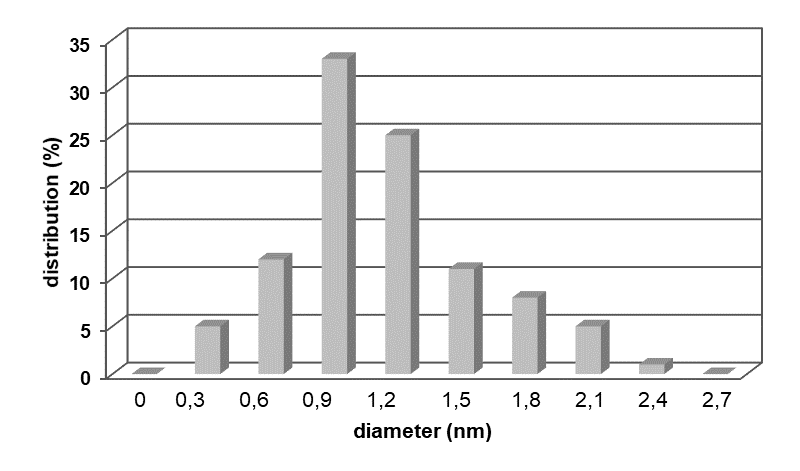


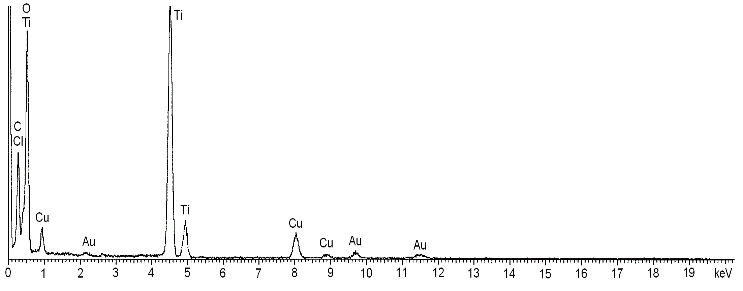


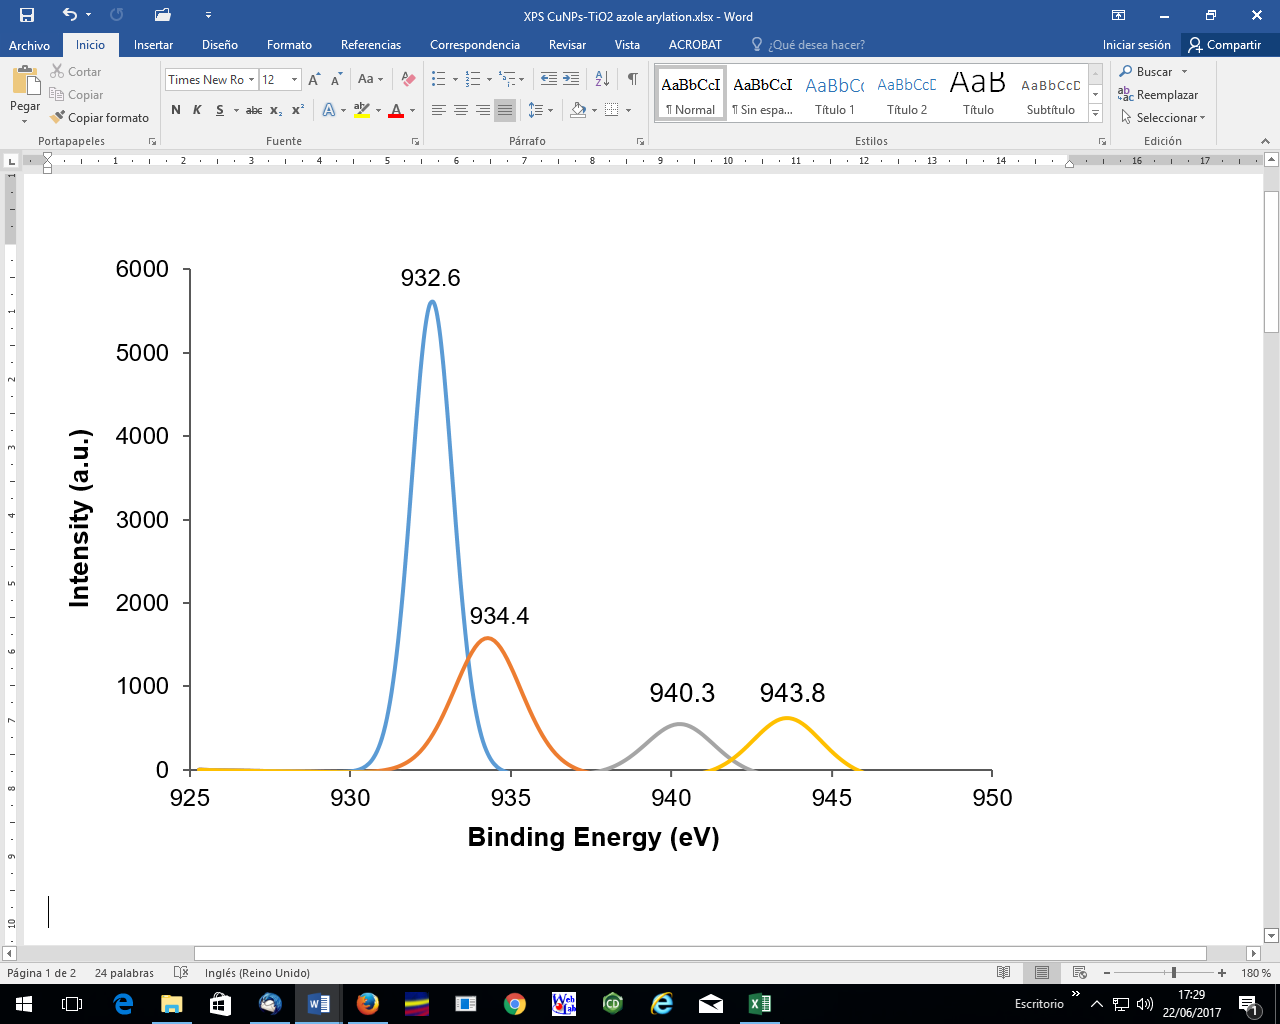


CuO

satellites

CuO

Cu2O

**Figure S3.** TEM micrograph, size distribution (125 NPs), EDX spectrum and XPS spectrum at the Cu 2*p*3/2 level of CuNPs/TiO2.

Median ± standard deviation: 0.98 ± 0.42 nm.

**Unsupported CuNPs**

**Spherical CuNPs**[4]


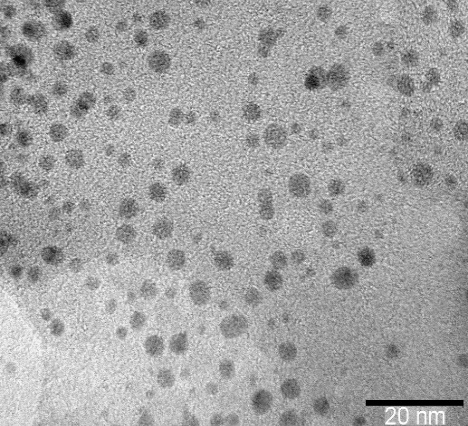


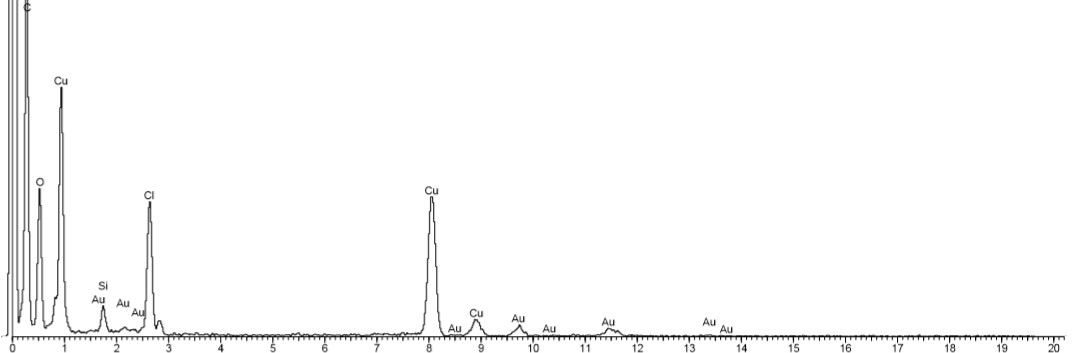


**Figure S4.** TEM micrograph, size distribution (230 NPs) and EDX spectrum of spherical CuNPs.

Median ± standard deviation: 2.88 ± 0.94 nm.

**Triangular CuNPs**[5]


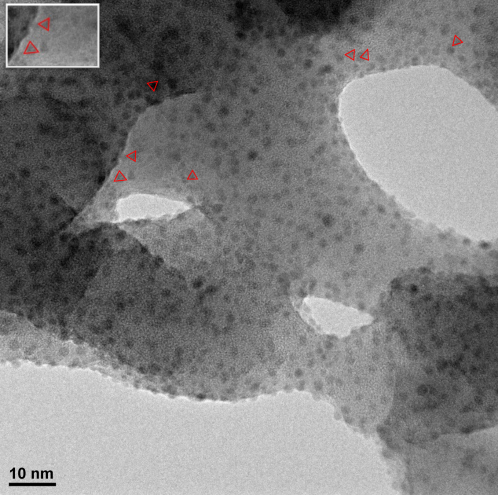


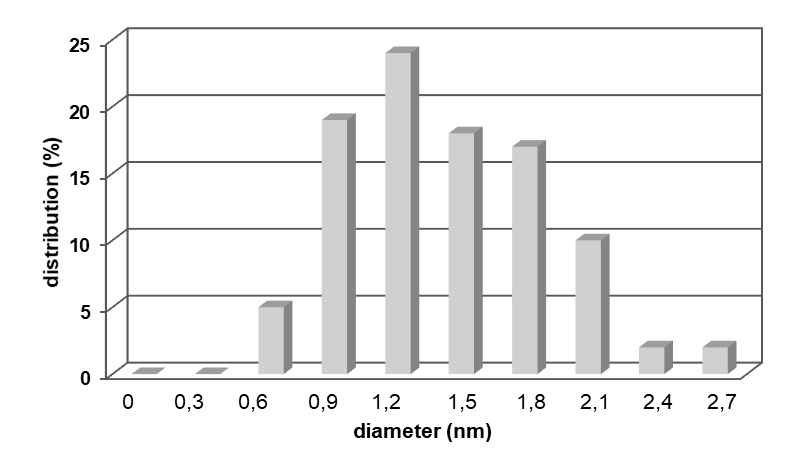


**Figure S5.** TEM micrograph and size distribution (100 NPs) of triangular CuNPs.

Median ± standard deviation: 1.27 ± 0.37 nm.

**Hexagonal CuNPs**[5]


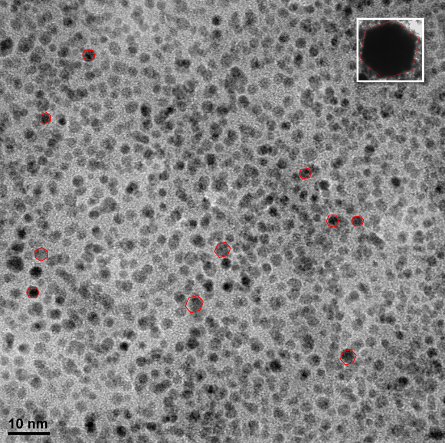


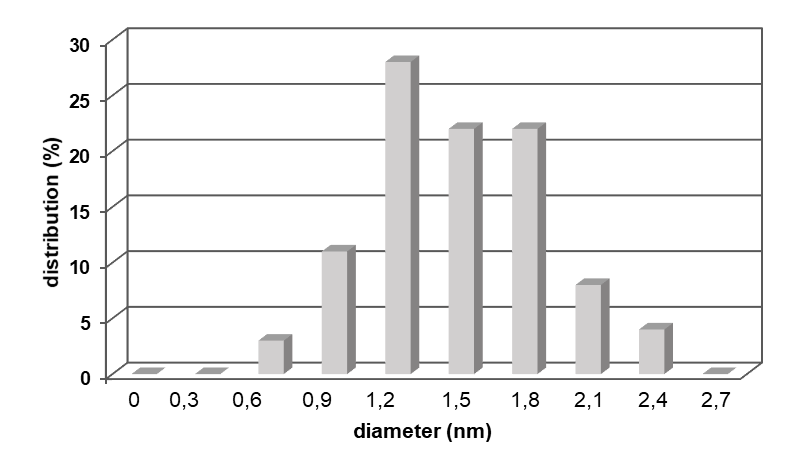


**Figure S6.** TEM micrograph and size distribution (100 NPs) of hexagonal CuNPs.

Median ± standard deviation: 1.81 ± 0.42 nm.


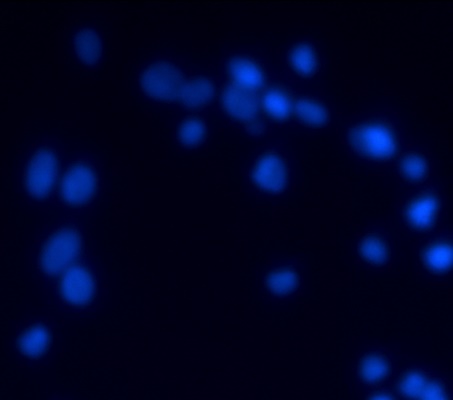

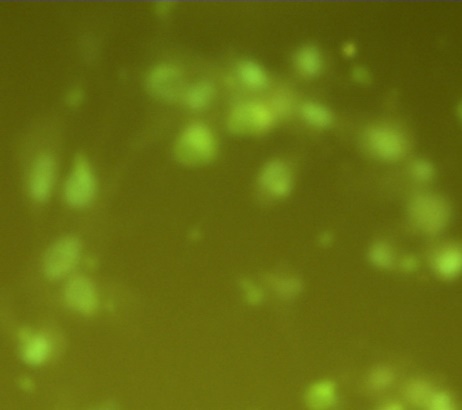
 (A)


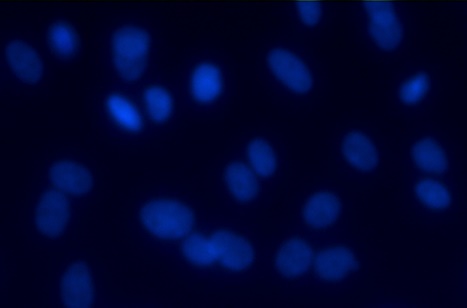

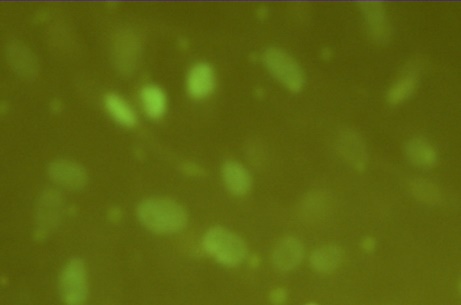
 (B)

**Figure S7.** Fluorescent images of porcine granulosa cells containing PCNA (A) and bax (B). Immunocytochemistry images showing 4′,6-diamidino-2-phenylindole dihydrochloride (DAPI, marker of nuclear DNA, blue) (left) and fluorescein isothiocyanate (FITC, marker of PCNA or bax antigen, green) staining in the same cells. Scale bars: 1 cm = 20 µm.

**References:**

[1] F. Alonso, Y. Moglie, G. Radivoy and M. Yus, *Org. Biomol. Chem.*,**2011**, *9*, 6385–6395.

[2] F. Alonso, A. Arroyo, I. Martín-García and Y. Moglie, *Adv. Synth. Catal.*, **2015**, *357*, 3549–3561.

[3] A. Y. Mitrofanov, A. V. Murashkina, I. Martín-García, F. Alonso and I. P. Beletskaya, *Catal. Sci. Technol.*, **2017**, *7*, 4401–4412.

[4] F. Alonso and M. Yus, *Pure Appl. Chem.*, **2008**, *80*, 1005–1012.

[5] K. J. Carroll; J. U. Reveles; M. D. Shultz; S. N. Khanna and E. E. Carpenter, *J. Phys. Chem. C*., **2011**, *115*, 2656–2664.
